# Supplementary material for: Root ABA Accumulation Delays Lateral Root Emergence in Osmotically Stressed Barley Plants by Decreasing Root Primordial IAA Accumulation
Source: MDPI journal article supplement (doi:10.3390/ijpb14010007), 2023-01-09
Supplement: s1 [file s1]

Archive with 1 entries (1 files):
- ijpb-2093854-supplementary.pdf
