# Supplementary material for: Root ABA Accumulation Delays Lateral Root Emergence in Osmotically Stressed Barley Plants by Decreasing Root Primordial IAA Accumulation
Source: MDPI journal article supplement (doi:10.3390/ijpb14010007), 2023-01-09
Supplement: s1 [file s1 › ijpb-2093854-supplementary.pdf]

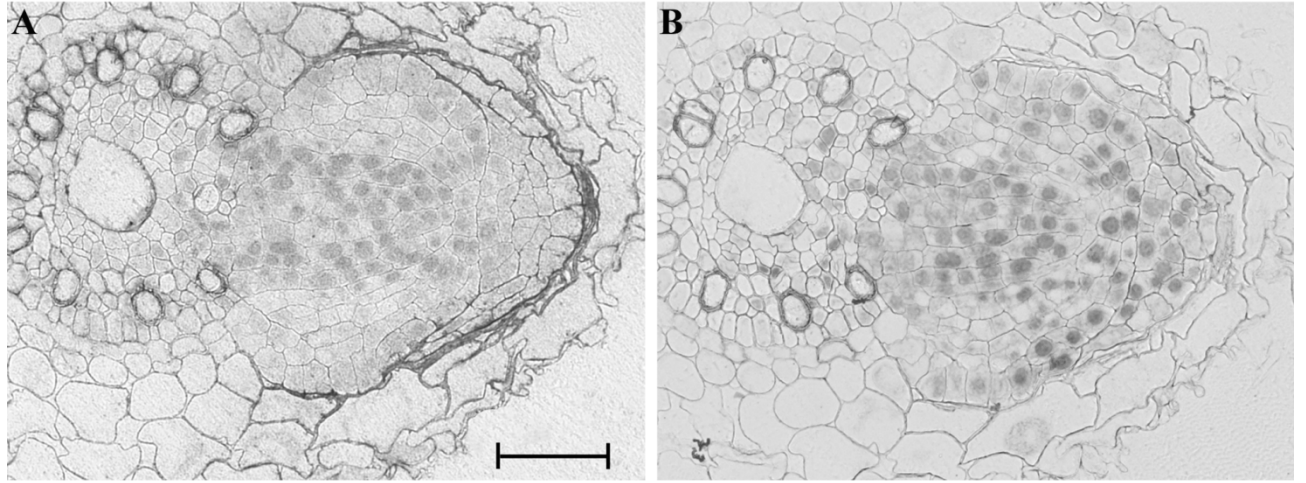

**Figure S1.** Immunolocalization of IAA (A) and staining with the Schiff reagent (B) of developing lateral root Steptoe primordia. Scale bar is 50  $\mu\text{m}$ .
